# 1 **Extracting the GEMs: Genotype, Environment and Microbiome interactions shaping host** 2 **phenotypes**

3 **Authors** Ben O. Oyserman<sup>1,2\*</sup>, Viviane Cordovez<sup>1,3</sup>, Stalin W. Sarango Flores<sup>3,4</sup>, Harm Nijveen<sup>2</sup>,  
4 Marnix H. Medema<sup>2</sup>, Jos M. Raaijmakers<sup>1,3\*</sup>

5  
6 1 Department of Microbial Ecology, Netherlands Institute of Ecology, 6708 PB Wageningen,  
7 The Netherlands

8 2 Bioinformatics Group, Wageningen University & Research, 6708 PB Wageningen, The  
9 Netherlands

10 3 Institute of Biology, Leiden University, 2333 BE Leiden, The Netherlands

11 4 Colegio de Ciencias Biológicas y Ambientales, Universidad San Francisco de Quito, Quito,  
12 Ecuador

13 \* Corresponding Authors

## 14 **Abstract**

15 One of the fundamental tenets of biology is that the phenotype of an organism ( $Y$ ) is determined  
16 by its genotype ( $G$ ), the environment ( $E$ ) and their interaction ( $GE$ ). Quantitative phenotypes can  
17 then be modeled as  $Y=G+E+GE+e$ , where  $e$  is the biological variance. This simple and tractable  
18 model has long served as the basis for studies investigating the heritability of traits and  
19 decomposing the variability in fitness. Increasingly, the importance of microbe interactions on  
20 organismal phenotypes is being recognized, but it is currently unclear what the relative  
21 contribution of microbiomes to a given host phenotype is and how this translates into the  
22 traditional GE model. Here we address this fundamental question and propose an expansion of  
23 the original model, referred to as GEM, which explicitly incorporates the contribution of the  
24 microbiome ( $M$ ) to the host phenotype, while maintaining the simplicity and tractability of the  
25 original GE model. We show that by keeping host, environment and microbiome as separate but  
26 interacting variables, the GEM model can capture the nuanced ecological interactions between  
27 these variables. Finally, we demonstrate with an *in vitro* experiment how the GEM model can be  
28 used to statistically disentangle the relative contributions of each component on specific host  
29 phenotypes.

## 30 **The genetic basis of ecological interactions**

31 Leveraging the beneficial interactions between plant hosts and their microbiomes represents a  
32 new direction in sustainable crop production. In particular, the emergence of *microbiome-*  
33 *associated phenotypes* (MAPs) (Oyserman *et al.*, 2018), such as growth promotion and disease  
34 suppression, is expected to reduce our dependency on energy-intensive and environmentally  
35 disturbing management practices. This may either be achieved through the addition of probiotics  
36 and prebiotics, or through breeding programs targeting MAPs to develop a next generation of  
37 ‘microbiome-activated’ or ‘microbe-assisted’ crop production systems (Busby *et al.*, 2017;  
38 Oyserman *et al.*, 2018). Hence, a major challenge is to identify the genotypic underpinning of  
39 emergent MAPs and understanding the pivotal role of the environment. To date, however, the  
40 relative contribution of microbiomes to a given host phenotype is not known for most host  
41 phenotypes. The interaction between genotype ( $G$ ) and environment ( $E$ ) has long been  
42 recognized as an important factor both in evolutionary biology (Via & Lande, 1985; Anderson *et*

43 *al.*, 2013) and breeding programs (Allard & Bradshaw, 1964). While a significant body of  
44 literature exists on quantitative investigations of GE interactions (El-Soda *et al.*, 2014), the bulk  
45 of this work has focused on abiotic parameters and has largely overlooked the microbiome.  
46 Nevertheless, the interactions between hosts, microbiomes and their environments are coming  
47 into increasing focus and scrutiny (Dal Grande *et al.*, 2018; Wallace *et al.*, 2018; Beilsmith *et al.*,  
48 2019; Bonito *et al.*, 2019).

49 One current opinion is that rather than viewing host plants and animals as individuals,  
50 they should be viewed together with their microbiomes as single cohesive unit of selection  
51 termed a 'holobiont' with a 'hologenome' (Bordenstein & Theis, 2015; Moran & Sloan, 2015;  
52 Douglas & Werren, 2016). Under this view, the microbiome (M) could be integrated into the G  
53 term of the GE model of host phenotypes. However, others have pointed out that treating hosts  
54 and their microbiomes as a single unit does not capture the broad range of interactions and  
55 fidelity between host and microbe (Douglas & Werren, 2016). Another popular opinion is that,  
56 as the environment is classically defined to include "physical, chemical, and biotic factors (such  
57 as climate, soil, and living things) that act upon an organism" ('Environment', 2019), M should  
58 be integrated into the E term of the GE model. However, an important distinction exists between  
59 E and M components; M is dynamic (i.e., have many interdependencies and may adapt or evolve  
60 through time), while E is driven through external processes. Here, we address these two  
61 viewpoints and propose that it is useful to introduce microbiomes and MAPs as a discrete unit  
62 within the GE model. In doing so, we put forth an updated GEM model that explicitly  
63 incorporates the microbiome (M) and its respective interactions with the genotype (G) and  
64 environment (E). Using these mathematical representations, we conceptually emphasize  
65 interesting cases that emerge from this framework (Figure 1). Finally, we present a simple 'one-  
66 microbe-at-a-time' experiment to highlight key features and challenges of unearthing GEM  
67 interactions, and to statistically disentangle the relative contributions of each of the GEM model  
68 components (Figure 2).

## 69 **The microbiome as a phenotype or microbiome-associated phenotypes?**

70 The relationship between the host and its microbiome may be generally defined and viewed in  
71 two ways. Firstly, microbiome community structure may be considered a phenotype of the host  
72 ( $Y$ ), henceforth 'microbiome as a phenotype' (Belheouane *et al.*, 2017; Rothschild *et al.*, 2018;  
73 Walters *et al.*, 2018). Under this view, taxonomic/functional features of the microbiome, are  
74 treated as the phenotype of the host ( $Y$ ). In this manner,  $Y$  (e.g. the abundance of a taxon or  
75 functional gene) may be represented based on the contribution and interaction between the  
76 genotype ( $G$ ), the environment ( $E$ ) and the remaining variance ( $e$ ) (Equation 1).

77 Secondly, a microbiome may be quantified by their impact on the host phenotypes  
78 (Kopac & Klassen, 2016; Oyserman *et al.*, 2018). In this view, MAPs such as plant growth  
79 promotion or plant health are treated as the phenotype ( $Y$ ) (Zeevi *et al.*, 2019). Here, we suggest  
80 explicitly expanding the environmental parameter of the traditional GE model (Equation 1), such  
81 that host genotype ( $G$ ), environmental factors ( $E$ ) and microbiome structure and function ( $M$ ) and  
82 their interactions all contribute to the observed host phenotype (Equation 2). Thus, measurements  
83 of the microbiome structure and function are used in conjunction with genotypic and  
84 environmental data to explain a MAP, an emergent phenotype of the host-microbe interaction.  
85 Additional components may be added to the GEM model to accommodate additional complexity.  
86 For example, M may be split into  $i$  components, where  $M_i$  represents the  $i^{\text{th}}$  taxonomical or  
87 functional feature. In this way, the GEM model is amenable for investigating the role of

88 microbe-microbe interactions within natural or synthetic communities, the interactions between  
89 multiple environmental factors, or any complex arrangements (see supplemental materials for  
90 discussion on an expanded GEM model). In Figure 1, we exhibit some basic features of the GEM  
91 model.

## 92 **Extracting the GEMs**

93 To demonstrate how the GEM model may be used to disentangle the relative influence of  
94 various factors on a particular host phenotype, we investigated GEM interactions in a simplified  
95 *in vitro* assay with one bacterial strain (*Bacillus* sp., accession number MN512243) interacting  
96 with two plant genotypes, a modern domesticated tomato cultivar (*Solanum lycopersicum* var  
97 moneymaker) and a wild tomato relative (*Solanum pimpinellifolium*) under two environmental  
98 conditions. In this model system, all genotype, environmental, microbial parameters are  
99 controlled and therefore can be systematically explored in a fully factorial design (details are in  
100 the supplemental material). For each tomato genotype, seedlings were grown in two  
101 environments, i.e. Murashige and Skoog agar medium (MS0) and MS agar medium  
102 supplemented with 10 g/L of sucrose (MS10). After germination, the root tips were inoculated  
103 with the *Bacillus* strain, which was originally isolated from the wild tomato rhizosphere. Control  
104 seedlings were inoculated with buffer only (Figure 2A). The plant phenotypes monitored were  
105 root architecture (using WinRhizo<sup>TM</sup>) and root and shoot dry mass (Figure 2B). An ANOVA was  
106 done to test the significance of each variable in the GEM model (Figure 2C). Together, the  
107 microbiome (M) and all interacting variables (GM, EM and GEM) explained 26% of root dry  
108 mass variance, 21% of shoot dry mass variance and 8% of root length total variance.  
109 Furthermore, in all cases the interacting parameters, GM, EM, and GEM interactions explained  
110 greater variance than GE interactions (Figure 2D).

111 A clear consensus is forming that microbiomes impact host phenotypes, but its relative  
112 contribution to that host phenotype is, in most cases, not known. The GEM model provides a  
113 simple, tractable and testable model demonstrating that the interactions of the microbiome and  
114 other model terms (GM, EM and GEM) are also essential determinants of host phenotypes. It is  
115 important to highlight that, in this case, GM interactions actually explain more variability than  
116 canonical GE interactions. Furthermore, the expanded GEM model captures other important  
117 features that may otherwise be easily overlooked, such as the genotype-independent interaction  
118 between EM. This states that microbe and environment may interact to alter host fitness  
119 independent of the genotype. For example, auxin is a plant hormone that promotes growth that is  
120 also produced by bacteria. Many bacterial cultures have differential auxin production dependent  
121 on their environment (Tsavkelova, 2005); therefore, it is likely that EM interactions can promote  
122 auxin production and thus plant growth independent on genotype. In practice, identifying EM  
123 may have important implications for synbiotics (mixtures of probiotics and prebiotics). In this  
124 manner, the GEM model not only provides a model to disentangle the contribution of G, E and  
125 M, but also serves as a powerful tool for conceptualization.

## 126 **The GEM model captures complex ecosystem processes**

127 As describe above, genotype, environment and microbiome may influence organismal phenotype  
128 directly, but also through their interactions. This dynamic is captured by the various *terms* that  
129 make up the GEM model, providing a simple means to conceptualize this otherwise complex  
130 system. In its most basic form (Equation 2), the GEM model has 8 terms in total. An example of  
131 a term with a single variable is ‘G’, a two variable term would be ‘GM’, and three variable term

132 would be ‘GEM’. While the basic GEM model contains terms related to inter-class interactions  
133 (GE, GM, etc.), it lacks terms representative of intra-class interactions (M:M, E:E, etc). By  
134 simply adding additional variables to the GEM model, M:M and other ecologically relevant  
135 interactions may be introduced as additional terms. The number of terms in a model is dependent  
136 on the number of variables ( $n$ ) that can be mathematically represented by Supplemental Equation  
137 1. In addition, the number of terms with  $r$  variables may be mathematically represented by  
138 Supplemental Equation 2, where  $n$  is the total number of variables, and  $r$  is the number of  
139 variables in the term. From this basis, a model of organismal phenotype which takes into account  
140 ecosystem-level processes may be constructed. To this end, we developed a simple Python script  
141 to generate a GEM model based on user input for any number of G, E and M variables  
142 (<https://github.com/Oyserman/GEM>).

143 To model the interactions between multiple microbiome members, such as those found in  
144 natural or synthetic communities, in Equation 3, we provide a simple expansion of the basic  
145 GEM Equation presented in the main text to add another microbiome variable. The result is a 4  
146 variable (GEM<sub>1</sub>M<sub>2</sub>) model that includes all  $r$ -way interactions terms necessary to model the  
147 impact of a two member community on any number of plant genotypes or environments. For  
148 clarity, Equation 3 is presented with all  $r$ -way interactions on separate lines. To show the  
149 versatility of the GEM model, we provide another expansion in which multiple hosts are  
150 interacting in a particular ecosystem (G<sub>1</sub>G<sub>2</sub>EM). In this case, the fitness of one plant genotype  
151 (G<sub>1</sub>) is influenced through interactions with a neighboring plant genotype (G<sub>2</sub>) and their  
152 associated microbiomes. A prominent example of this in literature are intercropping systems in  
153 which nitrogen fixation through legume-microbiome interactions benefit other non-leguminous  
154 plants in a nitrogen limited soil ecosystem (Peoples *et al.*, 1995).

## 155 **Conclusions**

156 A fundamental tenet of biology is that genotype and environment interact and impact the fitness  
157 and phenotype of an organism. The GE model of organismal phenotype has been the cornerstone  
158 of modern breeding programs. Part of the power of the GE model is its simplicity and  
159 interpretability. However, the important role of host-associated microbiomes has recently come  
160 into focus. Here, we investigated how microbiomes (M) fit into the GE model, suggest an  
161 explicit expansion to include M, and argue that, because of its dynamic and evolving nature, that  
162 M should not be collapsed within E. We use a conceptual figure to show that the updated GEM  
163 model captures the diverse possible outcomes of between G, E and M. To support our model, we  
164 present an *in vitro* experiment with one microbe demonstrating not only how to use the GEM  
165 model, but also showing that GM interactions may explain more variability than GE interactions.  
166 Finally, additional examples of expanded GEM models which take into account M:M and  
167 G<sub>2</sub>:E:M interactions are presented to demonstrate the ecological versatility of the GEM model.  
168 Taken together, we propose that the GEM model provides a simple and interpretable expansion  
169 of the GE model. Furthermore, given the important role of the microbiome, any investigations  
170 into GE interactions must also account or control for M.

## 171 **Conflict of interest**

173 The authors declare that they have no conflict of interest.

## 174 **Acknowledgements**

176 We thank Victor Carrion, Azkia Nurfikari and Hannah McDermott for contributing the isolate.  
177 The contributions of Ben Oyserman and Jos Raaijmakers were funded in part by the Technology  
178 Foundation of the Dutch National Science Foundation (NWO-TTW)  
179  
180  
181

182 **Citations**

- 183 **Allard RW, Bradshaw AD. 1964.** Implications of Genotype-Environmental Interactions in  
184 Applied Plant Breeding. *Crop Science* **4**: 503.
- 185 **Anderson JT, Lee C-R, Rushworth CA, Colautti RI, Mitchell-Olds T. 2013.** Genetic trade-  
186 offs and conditional neutrality contribute to local adaptation. *Molecular Ecology* **22**: 699–708.
- 187 **Beilsmith K, Thoen MPM, Brachi B, Gloss AD, Khan MH, Bergelson J. 2019.** Genome-wide  
188 association studies on the phyllosphere microbiome: Embracing complexity in host-microbe  
189 interactions. *The Plant Journal* **97**: 164–181.
- 190 **Belheouane M, Gupta Y, Künzel S, Ibrahim S, Baines JF. 2017.** Improved detection of gene-  
191 microbe interactions in the mouse skin microbiota using high-resolution QTL mapping of 16S  
192 rRNA transcripts. *Microbiome* **5**: 59.
- 193 **Bonito G, Benucci GMN, Hameed K, Weighill D, Jones P, Chen K-H, Jacobson D, Schadt  
194 C, Vilgalys R. 2019.** Fungal-Bacterial Networks in the Populus Rhizobiome Are Impacted by  
195 Soil Properties and Host Genotype. *Frontiers in Microbiology* **10**: 481.
- 196 **Bordenstein SR, Theis KR. 2015.** Host Biology in Light of the Microbiome: Ten Principles of  
197 Holobionts and Hologenomes (MK Waldor, Ed.). *PLOS Biology* **13**: e1002226.
- 198 **Busby PE, Soman C, Wagner MR, Friesen ML, Kremer J, Bennett A, Morsy M, Eisen JA,  
199 Leach JE, Dangl JL. 2017.** Research priorities for harnessing plant microbiomes in sustainable  
200 agriculture. *PLOS Biology* **15**: e2001793.
- 201 **Dal Grande F, Rolshausen G, Divakar PK, Crespo A, Otte J, Schleuning M, Schmitt I.  
202 2018.** Environment and host identity structure communities of green algal symbionts in lichens.  
203 *New Phytologist* **217**: 277–289.
- 204 **Douglas AE, Werren JH. 2016.** Holes in the Hologenome: Why Host-Microbe Symbioses Are  
205 Not Holobionts. *mBio* **7**: e02099-15, /mbio/7/2/e02099-15.atom.
- 206 **El-Soda M, Malosetti M, Zwaan BJ, Koornneef M, Aarts MGM. 2014.** Genotype ×  
207 environment interaction QTL mapping in plants: lessons from Arabidopsis. *Trends in Plant  
208 Science* **19**: 390–398.
- 209 **Definition of ENVIRONMENT. 2019.** *Merriam-Webster*. [https://www.merriam-  
210 webster.com/dictionary/environment](https://www.merriam-webster.com/dictionary/environment)
- 211 **Kopac SM, Klassen JL. 2016.** Can They Make It on Their Own? Hosts, Microbes, and the  
212 Holobiont Niche. *Frontiers in Microbiology* **7**.
- 213 **Moran NA, Sloan DB. 2015.** The Hologenome Concept: Helpful or Hollow? *PLOS Biology* **13**:  
214 e1002311.
- 215 **Oyserman BO, Medema MH, Raaijmakers JM. 2018.** Road MAPs to engineer host  
216 microbiomes. *Current Opinion in Microbiology* **43**: 46–54.

- 217 **Peoples MB, Herridge DF, Ladha JK. 1995.** Biological nitrogen fixation: An efficient source  
218 of nitrogen for sustainable agricultural production? *Plant and Soil* **174**: 3–28.
- 219 **Rothschild D, Weissbrod O, Barkan E, Kurilshikov A, Korem T, Zeevi D, Costea PI,**  
220 **Godneva A, Kalka IN, Bar N, et al. 2018.** Environment dominates over host genetics in  
221 shaping human gut microbiota. *Nature* **555**: 210.
- 222 **Via S, Lande R. 1985.** Genotype-Environment Interaction and the Evolution of Phenotypic  
223 Plasticity. *Evolution* **39**: 505–522.
- 224 **Wallace JG, Kremling KA, Kovar LL, Buckler ES. 2018.** Quantitative Genetics of the Maize  
225 Leaf Microbiome. *Phytobiomes Journal* **2**: 208–224.
- 226 **Walters WA, Jin Z, Youngblut N, Wallace JG, Sutter J, Zhang W, González-Peña A,**  
227 **Peiffer J, Koren O, Shi Q, et al. 2018.** Large-scale replicated field study of maize rhizosphere  
228 identifies heritable microbes. *Proceedings of the National Academy of Sciences* **115**: 7368–7373.
- 229 **Zeevi D, Korem T, Godneva A, Bar N, Kurilshikov A, Lotan-Pompan M, Weinberger A,**  
230 **Fu J, Wijmenga C, Zhernakova A, et al. 2019.** Structural variation in the gut microbiome  
231 associates with host health. *Nature* **568**: 43–48.

232

233

$$Y = G + E + G:E + e$$

234 **Equation 1. The traditional model for GE interactions:** In the canonical model of quantitative phenotypes, the host phenotype  
235 ( $Y$ ) is explained by the sum of  $G$ ,  $E$ , their interactions ( $G:E$ ), and  $e$  the residual error. This model may be used to calculate the  
236 proportion of variance explained by the host genome and the environment on a host associated microbiome community. In other  
237 words, the microbiome may be treated as  $Y$ , the phenotype of the host (e.g. 'the microbiome as a phenotype'). When  $E$  has no  
238 contribution to  $Y$ , only  $G$  determines the abundance or function of the microbiome (Figure 1C). On the other side of the spectrum,  
239 only  $E$  determines to the abundance or function of the microbiome (Figure 1B).

$$Y = G + E + M + G:E + G:M + E:M + G:E:M + e$$

240 **Equation 2. The new GEM model:** When a microbiome has a quantitative impact on host phenotype, the traditional GE model  
241 may be expanded to incorporate  $M$  and all respective interactions ( $GM$ ,  $EM$ , and  $GEM$ ). Unlike the GE model, which may be  
242 used to explain the microbiome, the expanded GEM model may be used to statistically disentangle the contribution of  $G$ ,  $E$  and  
243  $M$  and their various interactions to changes in host phenotype. When  $M$  has no impact, this variable and those associated with it  
244 fall out of the equation giving the GE model. These, and other special cases are conceptually explored further in Figure 2. Thus,  
245 this model is capable of capturing the nuanced dynamics of host-microbiome interactions, such as host-microbe interactions that  
246 are environment-specific, or otherwise have lower fidelity than strict symbiosis (Douglas & Werren, 2016).

$$Y =$$

$$G + E + M_1 + M_2 +$$

$$G:E + G:M_1 + G:M_2 + E:M_1 + E:M_2 + M_1:M_2 +$$

$$G:E:M_1 + G:E:M_2 + G:M_1:M_2 + E:M_1:M_2 +$$

$$G:E:M_1:M_2$$

$$+ e$$

247 **Equation 3. A GEMM model:** The basic GEM model may be expanded to include any number of complex interactions. Here  
248 we expand the GEM model to include microbe-microbe interactions. This results in the addition of 1-way, 2-way, 3-way and 4-  
249 way interaction terms, which are shown on separate lines for clarity.

250 **Figure 1. Conceptualizing the GEM model:** Here we graphically explore how the interactions between genotypes, environment  
251 and microbiome may impact a host phenotype ( $Y$ ). The two genotypes are indicated by  $G1$  and  $G2$ , and the presence of a  
252 microbiome is indicated by solid circles (as shown in panel a). The different environments are indicated as Env 1 and Env 2 on  
253 the X-axis. In each case (panels a-o), the corresponding equation is depicted over the figure itself. In cases when we treat the  
254 microbiome as a phenotype of the host, the relative abundance of a particular taxon, or other features of a microbiome, may be  
255 considered as the sum of  $G$  and  $E$  interactions (panels a-e). In simple cases, the relative abundance is independent of genotype  
256 (panel b) or environment (panel c). More likely, both genotype and environment, and their interactions will contribute to relative  
257 abundance/function (panels d and e respectively). Panels a-e are special cases of the GEM model, indicating situations in which  
258 the microbiome does not contribute to a particular host phenotype. Building complexity, each of  $G$ ,  $E$  and  $M$  may contribute to  
259 host phenotypes individually or in combination, but without interaction (panels a-d and f-i). Finally, the highest level of  
260 complexity occurs once interactions between  $G$ ,  $E$  and  $M$  occur (panels e, j-o). A salient feature of this representation is that  
261 when no interaction between variables exists, the slope is equal between treatments. This model may also provide practical  
262 insights, such as identifying optimal prebiotics which may be expected to have a broad host range (no  $G$  interaction) and be  
263 conditionally neutral (panel l). Additionally, this model may serve to characterize complex interactions, such as conditional  
264 symbiosis where a host fitness is reduced to zero without a microbiome (taxon or function) in a particular environment (panel o).

265 **Figure 2. Extracting the GEMs from the simplified GEM experiment:** (Panel a) In this in vitro experiment, the contribution of  
266  $G$ ,  $E$ ,  $M$  and their interactions were investigated in a fully factorial design. (Panel b) In total, two tomato genotypes, two  
267 environments and one microbe treatment were investigated. Various plant phenotypes were measured, but for clarity, only the  
268 average dry root mass of each treatment are visualized here. (Panel c) The GEM model shows that  $G$ ,  $E$ ,  $M$ ,  $GM$  and  $GEM$  all  
269 contribute significantly to root mass. The ANOVA table displays the reported Df (Degrees of freedom), Sum sq (Sum-of-squares),  
270 Mean sq (Mean some-of-squares), the  $F$ -value (the test statistic of an ANOVA),  $Pr(>F)$  (the  $p$ -value), and Signif. (a visual  
271 indication of the level of significance). (Panel d) Here we present the ANOVA outcome showing the percent of the total sum of  
272 squares for dry shoot mass, dry root mass and root length. For shoot mass, plant genotype explained the greatest portion of  
273 variance. In contrast, both  $E$  and  $M$  explained a greater amount of variation than plant genotype for root length. Importantly, for  
274 each of the three plant phenotypic parameters measured,  $GM$  explained a greater amount of variation than  $GE$ .



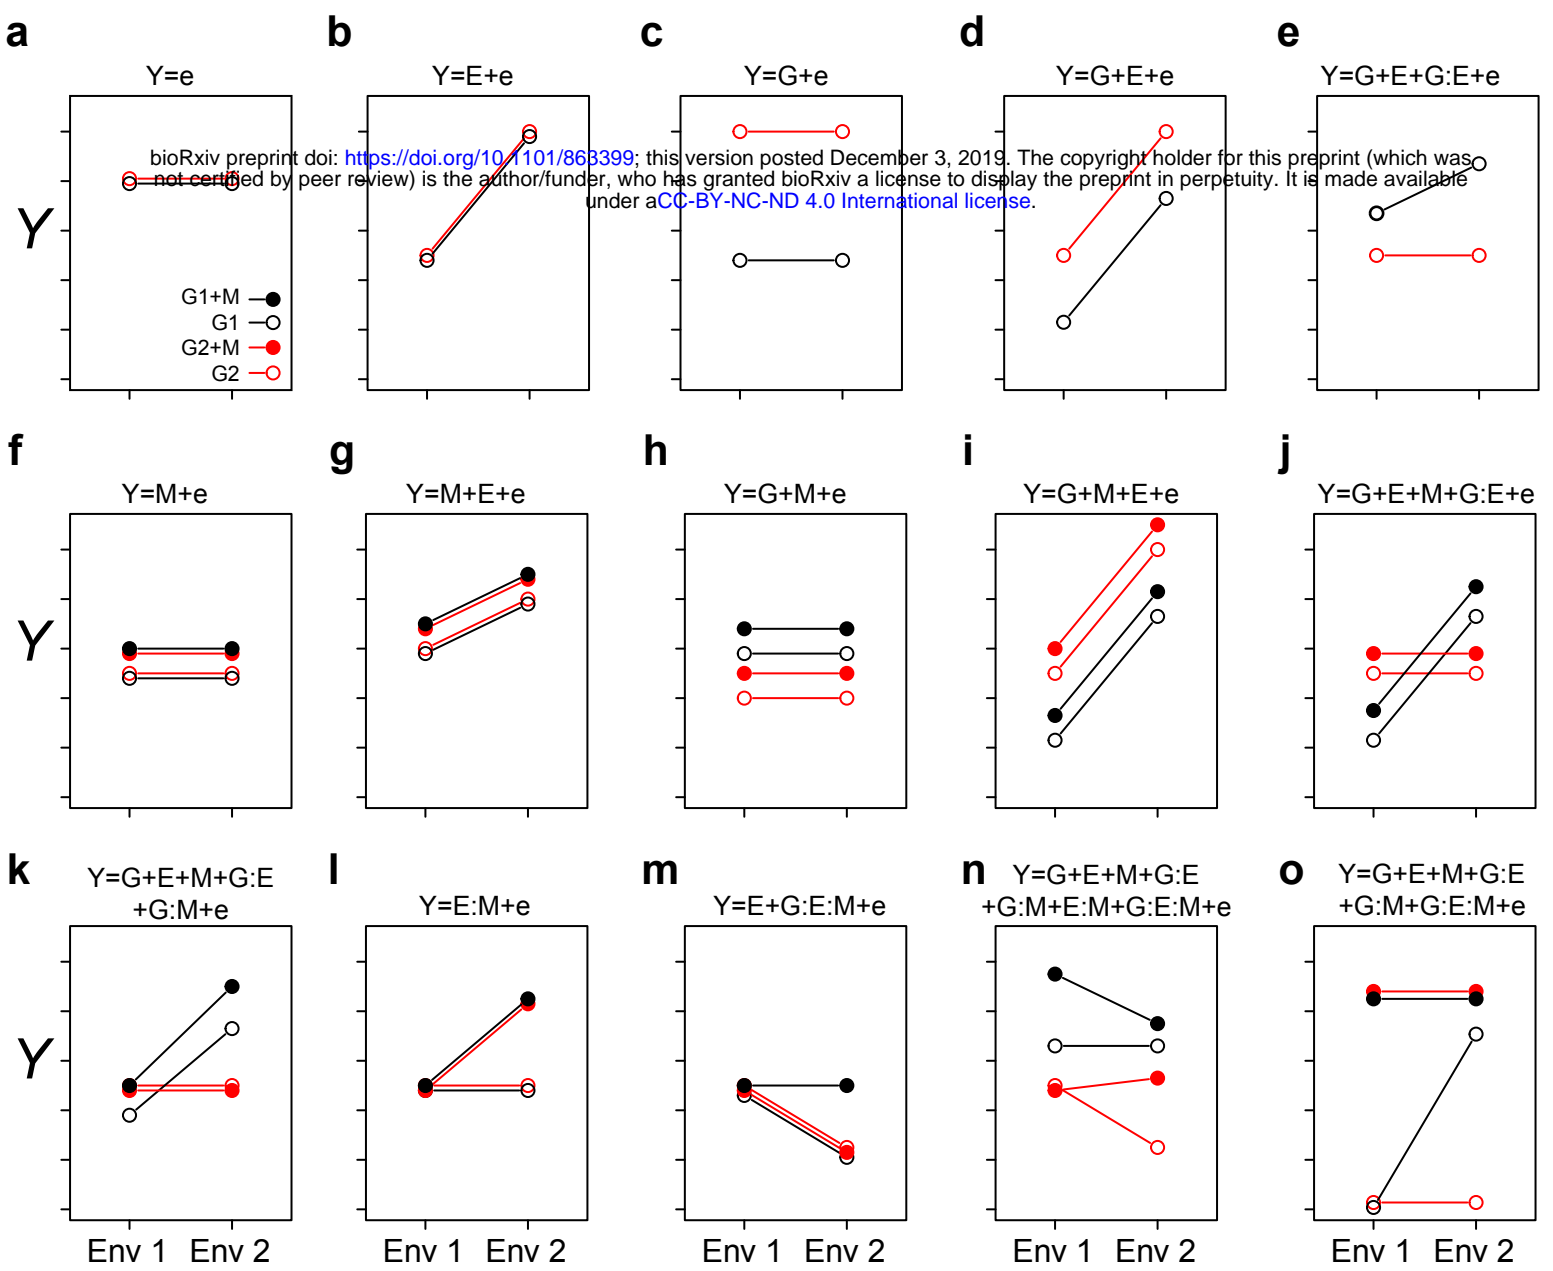

**a**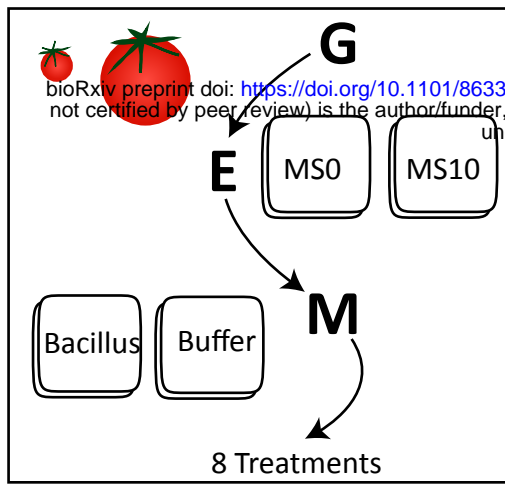**c**

|      | Df | Sum Sq  | Mean Sq | F-value | Pr(>F)   | Signif. |
|------|----|---------|---------|---------|----------|---------|
| G    | 1  | 4034366 | 4034366 | 46.011  | 3.28E-09 | ***     |
| E    | 1  | 2645446 | 2645446 | 30.17   | 6.19E-07 | ***     |
| M    | 1  | 1755184 | 1755184 | 20.017  | 2.95E-05 | ***     |
| GE   | 1  | 4965    | 4965    | 0.057   | 0.81262  |         |
| GM   | 1  | 850067  | 850067  | 9.695   | 0.00269  | **      |
| EM   | 1  | 249609  | 249609  | 2.847   | 0.09608  | .       |
| GEM  | 1  | 584801  | 584801  | 6.669   | 0.01193  | *       |
| Res. | 69 | 6050144 | 87683   |         |          |         |

**b**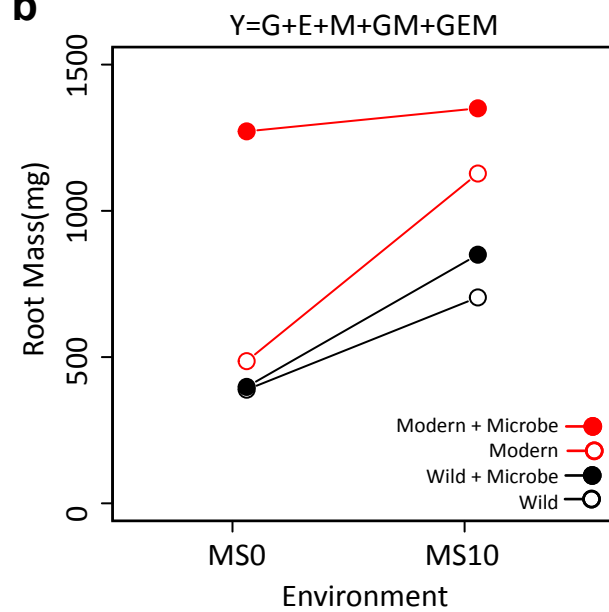**d**

|      | Shoot Mass | Root Mass | Root Length |
|------|------------|-----------|-------------|
| G    | 53%        | 25%       | 9%          |
| E    | 16%        | 16%       | 22%         |
| M    | 3%         | 11%       | 12%         |
| GE   | 1%         | 0%        | 1%          |
| GM   | 2%         | 5%        | 10%         |
| EM   | 2%         | 2%        | 1%          |
| GEM  | 1%         | 4%        | 3%          |
| Res. | 23%        | 37%       | 43%         |
